# Supplementary material for: Structural and mechanistic insights into type II trypanosomatid tryparedoxin-dependent peroxidases
Source: PubMed Central journal article supplement — Biochem J. 2008 Aug 27;414(Pt 3):375–81. doi: 10.1042/BJ20080889 (PMC2552391; doi:10.1042/bj20080889), 2008-08-27
Supplement: bj4140375add.pdf [file bj4140375add.pdf]

## SUPPLEMENTARY ONLINE DATA

# Structural and mechanistic insights into type II trypanosomatid tryparedoxin-dependent peroxidases

Magnus S. ALPHEY<sup>1</sup>, Janine KÖNIG<sup>1</sup> and Alan H. FAIRLAMB<sup>2</sup>

Division of Biological Chemistry and Drug Discovery, College of Life Sciences, University of Dundee, Dundee DD1 5EH, Scotland, U.K.

**Table S1** Data collection and refinement statistics for *TbTDPX2*

Numbers in parentheses represent the highest resolution bin of width approx. 0.06 Å.

| Parameter                                  | Value           |
|--------------------------------------------|-----------------|
| Space group                                | P2 <sub>1</sub> |
| Cell dimensions                            |                 |
| <i>a</i>                                   | 43.3 Å          |
| <i>b</i>                                   | 32.7 Å          |
| <i>c</i>                                   | 58.3 Å          |
| β                                          | 95.9°           |
| X                                          |                 |
| Resolution (Å)                             | 58.0–2.1        |
| Observed reflections                       | 37396           |
| Unique reflections                         | 9469            |
| Wilson <i>B</i> (Å <sup>2</sup> )          | 27.3            |
| Completeness (%)                           | 96.2 (78.5)     |
| Multiplicity                               | 3.9 (2.7)       |
| <i>R</i> <sub>merge</sub> (%)              | 5.9 (26.0)      |
| <i>I</i> / <i>σ</i> ( <i>I</i> )           | 25.5 (12.2)     |
| <i>R</i> <sub>work</sub> (%)               | 20.5 (23.2)     |
| <i>R</i> <sub>free</sub> (%)               | 26.3 (24.9)     |
| r.m.s.d. from ideal values                 |                 |
| Bond lengths (Å)                           | 0.008           |
| Bond angles (°)                            | 1.114           |
| B factors (Å <sup>2</sup> )                |                 |
| Overall                                    | 27.7            |
| Main chain                                 | 27.2            |
| Side chain                                 | 28.1            |
| Waters                                     | 31.5            |
| Residues in most favourable regions (%)    | 92.1            |
| Residues in additional allowed regions (%) | 7.9             |

<sup>1</sup> These authors contributed equally to this work.<sup>2</sup> To whom correspondence should be addressed (email a.h.fairlamb@dundee.ac.uk).

The model co-ordinates and structure factors have been deposited with the RSCB PDB (Research Collaboratory for Structural Bioinformatics Protein Data Bank) under the accession code 2VUP.

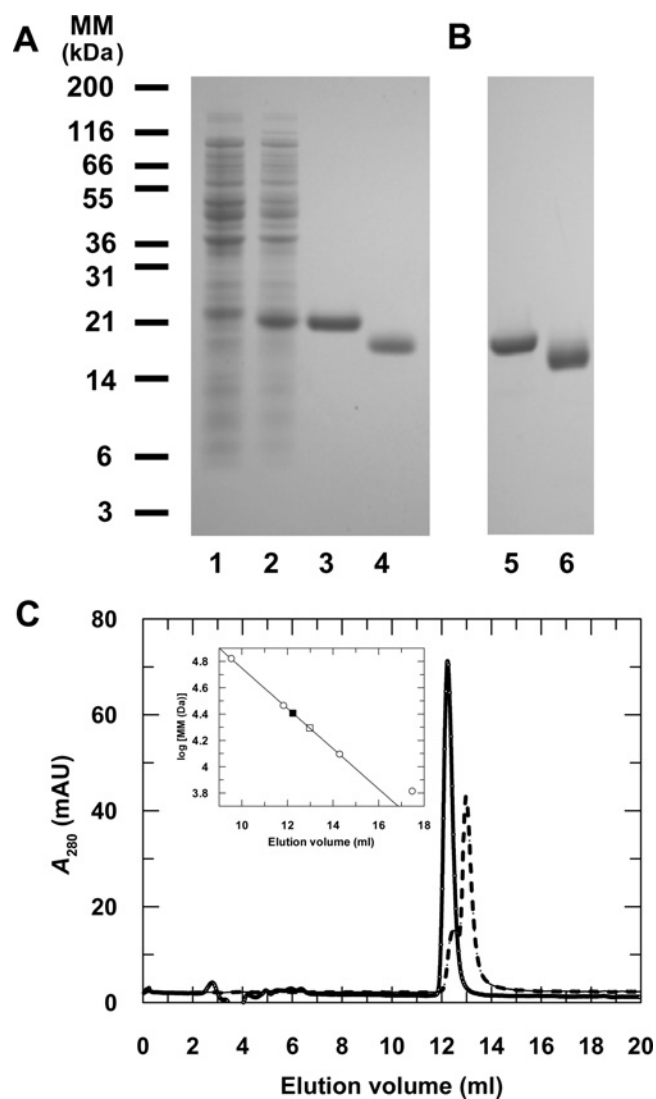

**Figure S1** Purification of recombinant *TbTDPX2* from *E. coli*

(A) SDS/PAGE analysis: lane 1, uninduced fraction of BL21 Star (DE3) pLysS (pET-15b-*TbTDPX2*); lane 2, 4 h after induction with isopropyl  $\beta$ -D-thiogalactopyranoside; lane 3, 2  $\mu$ g of purified His<sub>6</sub>-tagged protein; lane 4, 2  $\mu$ g of non-tagged *TbTDPX2*. Abbreviation: MM, molecular mass. (B) SDS/12%-(w/v)-NuPAGE analysis: lane 5, 2  $\mu$ g of non-tagged reduced *TbTDPX2* (50 mM dithiothreitol); lane 6, 2  $\mu$ g of non-tagged oxidised *TbTDPX2* (5-fold molar excess of H<sub>2</sub>O<sub>2</sub>). The redox state was maintained with 100 mM iodoacetamide. (C) Size-exclusion chromatography of reduced and oxidised *TbTDPX2* on Superdex 75 10/300 GL. Broken line, *TbTDPX2* reduced with 50 mM dithiothreitol; continuous line, *TbTDPX2* oxidized with a 5-fold molar excess of H<sub>2</sub>O<sub>2</sub>. The inset shows a plot of elution volume versus log (molecular mass) in Da { $\log [MM \text{ (Da)}]$ } of low-molecular-mass standards (Sigma-Aldrich; albumin, 66 000 Da; carbonic anhydrase, 29 000 Da; cytochrome c, 12 400 Da; aprotinin, 6500 Da). The predicted molecular mass of the *TbTDPX2* monomer is 19 168 Da. The elution volume of the reduced protein is represented by  $\square$  (molecular mass 19 600 Da) and the oxidized protein by  $\blacksquare$  (molecular mass 25 400 Da). Abbreviation: mAU, milli-absorbance unit.

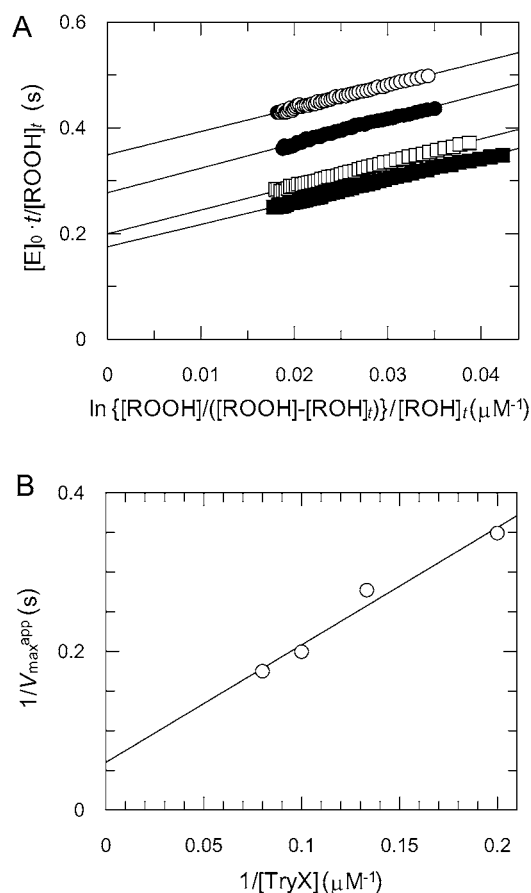

**Figure S2** Kinetic properties of *TbTDPX2* analysed by the integrated Dalziel rate equation

Kinetic properties of *TbTDPX2* were analysed by progress-curve analysis using the integrated Dalziel rate equation for a two-substrate reaction. (A) The peroxidase activity of *TbTDPX2* was determined with 75  $\mu\text{M}$  cumene hydroperoxide and various concentrations of TryX ( $\circ$ , 5  $\mu\text{M}$ ;  $\bullet$ , 7.5  $\mu\text{M}$ ;  $\square$ , 10  $\mu\text{M}$ ;  $\blacksquare$ , 12.5  $\mu\text{M}$ ). The slope corresponds to  $\varphi_1$ , the reciprocal of the rate constant,  $k_1$ , for cumene hydroperoxide.  $[E]_0$  is initial enzyme concentration, and  $t$  is time. (B) Secondary plot of the reciprocal apparent  $V_{\max}$  data, calculated from the intercepts of the first plot, against the reciprocal TryX concentrations. The slope corresponds to  $\varphi_2$ , the reciprocal of rate constant,  $k_2$ , for TryX, and the ordinate intercept corresponds to  $\varphi_0$ , the reciprocal of the catalytic-centre activity,  $k_{\text{cat}}$ . Kinetic constants are reported in Table 1 of the main paper.

Received 2 May 2008/2 June 2008; accepted 4 June 2008

Published as BJ Immediate Publication 4 June 2008, doi:10.1042/BJ20080889
